# Supplementary material for: A high-resolution 7-Tesla fMRI dataset from complex natural stimulation with an audio movie
Source: PubMed Central journal article supplement (PMC4322572; doi:10.1038/sdata.2014.3), 2014-05-27
Supplement: sdata20143-s2.pdf [file sdata20143-s2.pdf]

# A high-resolution 7-Tesla fMRI dataset from complex natural stimulation with an audio movie

## Supplementary material

Michael Hanke, Florian J. Baumgartner, Pierre Ibe, Falko R. Kaule, Stefan Pollmann, Oliver Speck, Wolf Zinke, Jörg Stadler

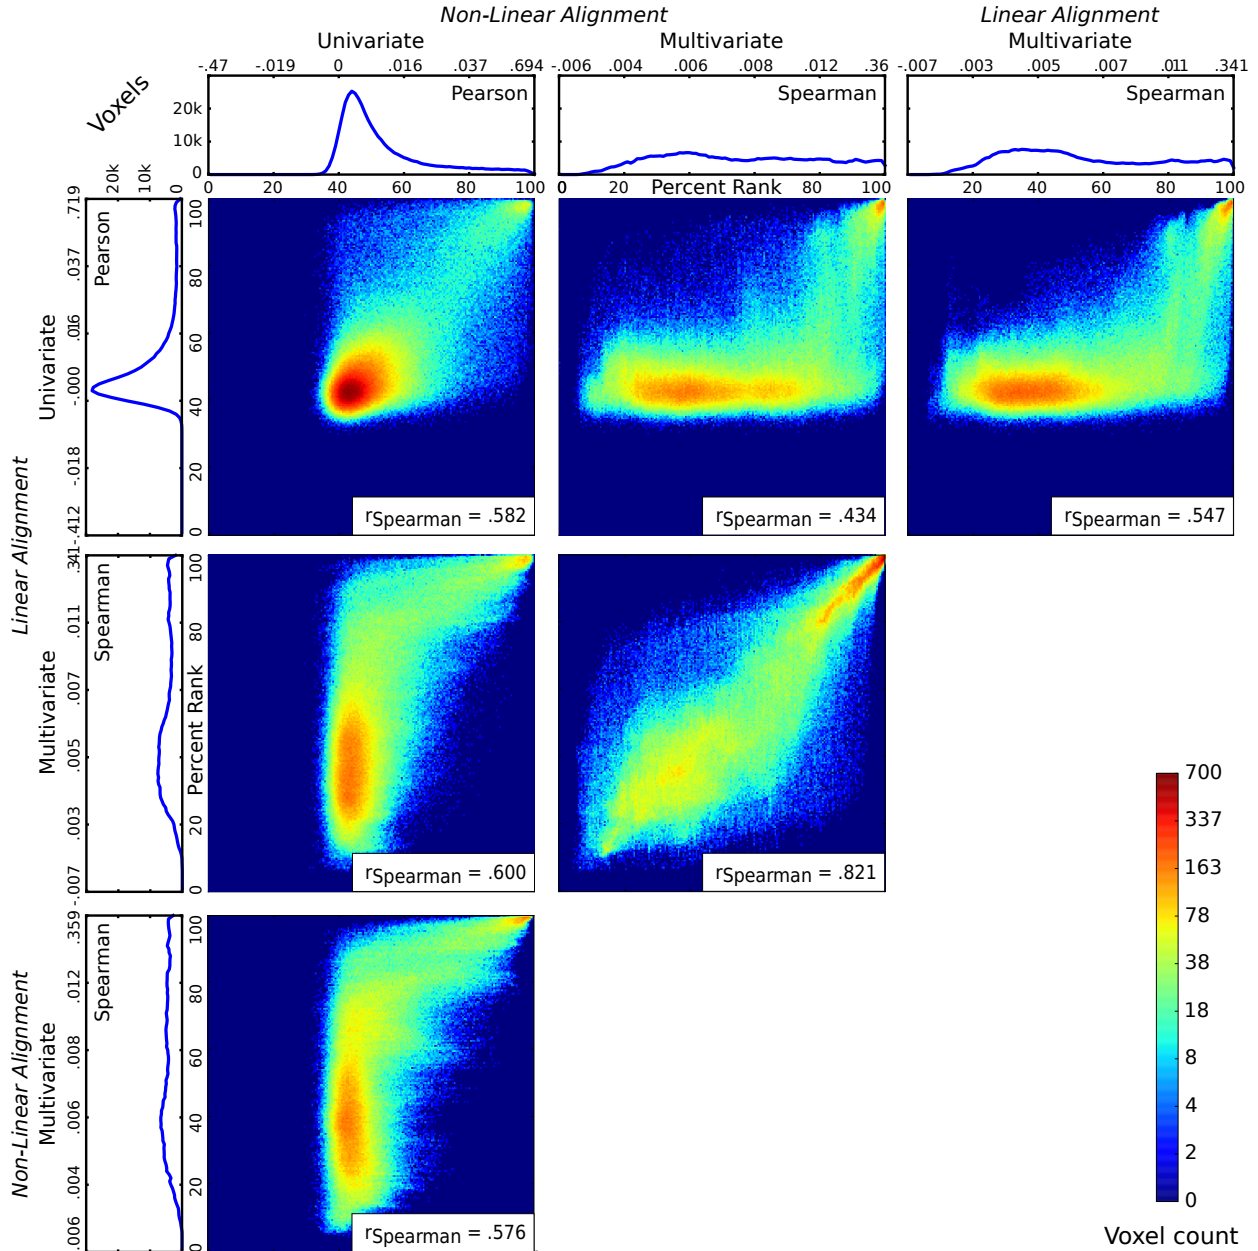

Supplementary Figure 1: Spatial correspondence of the mean multivariate representational consistency map and the univariate inter-individual correlation map for linear and non-linear anatomical alignment. The graphs show the distribution of the percent ranks and the corresponding Pearson and Spearman coefficient for the uni- and multivariate mean map respectively. The 2D histograms illustrate spatial covariance of two distributions. Spearman correlation over voxel specific percent ranks pairs estimates the spatial correspondence.
